# Supplementary material for: Overexpression of Plasmodium falciparum M1 Aminopeptidase Promotes an Increase in Intracellular Proteolysis and Modifies the Asexual Erythrocytic Cycle Development
Source: MDPI journal article supplement (doi:10.3390/pathogens10111452), 2021-11-09
Supplement: s1 [file s1]

## PEF-PfA-M1-GPF plasmid sequence

CTAGCTTAATCTTTCCGAGCTCTTTATGCTTAAGTTTACAATTTAATATTCATACTTTAAGTATTTTTGT  
AGTATCCTAGATATTGTGCTTAAATGCTCACCCCTCAAAGCACCAGTAATATTTTCATCCACTGAAATA  
CCATTAAATTTTCAAAAAAATACTATGCATATAATGTTATACATATAAACATAAAACGCCATGTAAATCA  
AAAAATATATAAAAAATATGTATAAAAAATAATATGCACTAAATATAAGCTAATTATGCATAAAAAATTAA  
AGTGCCCTTTATTAAGTAGCTAGTCGTAATTATTTATATTTCTATGTTATAAAAAAATCCTCATATAATAA  
TATAATTAATATATGTAATGTTTTTTTTATTTTATAATTTTAATATAAAATAATATGTAAATTAATTCAAAA  
AATAAATATAAATTGTTGTGAAACAAAAACGTAATTTTTTTCATTTGCCTTCAAAAATTTAAATTTATTTTAA  
TATTTCTAAATATATATACTTTGTGTATAAATATATAAAAAATATATATTTGCTTATAAATAAATAAAAA  
TTTTATAAAACTCGAGATGGAACCGAAAATTCAATTATCGCAAAGATTATAAACCGAGCGGCTTTATTATT  
AATAATGTGACCCTGAACATTAATATTCATGATAATGAAACCATTGTGCGCAGCGTTCTGGATATGGAT  
ATTTCAAAACATAATGTGGGCGAAGATCTGGTTTTGATGGTGTGGCCTGAAAATTAATGAAATTAGC  
ATCAATAATAAAAAACTGGTGGAAGGCGAAGAATATACCTATGATAATGAATTTCTGACCATTTTTAGC  
AAATTTGTGCCGAAAAGCAAATTTGCCTTTAGCAGCGAAGTGATTATTCATCCGGAACCAATTATGCA  
CTGACCGGTCTGTATAAAAGCAAAAATATTATTGTGAGCCAGTGCGAAGCAACCGGTTTTCGTCGTATT  
ACCTTTTTTATTGATCGTCCGATATGATGGCCAAATATGATGTTACCGTGACCGCAGATAAAGAAAAA  
TATCCGGTTCTGCTGAGCAATGGCGATAAAGTTAATGAATTTGAAATCCGGGTGGTCGTATGGTGCA  
CGTTTTAATGATCCGCATCTGAAACCGTGTTACCTGTTGTCAGTTGTTGCCGGTGATCTGAAACATCTGA  
GCGCAACCTATATTACCAAATATACCAAAAAAAGTGGAAGTGTATGTGTTAGCGAAGAAAAATATG  
TGAGCAAAGTGAATGGGCACTGGAATGTCTGAAAAAAGCATGGCCTTTGATGAAGATTATTTTGGC  
CTGGAATATGATCTGAGCCGTCTGAATCTGGTTGCAGTTAGCGATTTAATGTTGGTGCCATGGAAAAT  
AAAGGCCTGAATATTTTAAATGCCAATAGCCTGCTGGCCAGCAAAAAAATAGCATTGATTTTAGCTAT  
GCCCCGATTCTGACCGTTGTTGGTCATGAATACTTCCATAATTATACCGGCAATCGTGTGACCCTGCGTG  
ATTGGTTTCAGCTGACCCTGAAAGAAGGTCTGACCGTTCATCGTGAAAACCTGTTTAGTGAAGAAATGA  
CCAAACCGTTACCACCGTCTGAGCCATGTTGATCTGCTGCGTAGCGTTTCTGGAAGATAGCA  
GTCCGCTGAGCCATCCGATTCTCCGGAAGCTATGTTAGCATGGAAAATTTTATACCACCACCGTGT  
ATGATAAAGGTAGCGAAGTTATGCGTATGTATCTGACCATTCTGGGTGAAGAATACTACAAAAAAGGC  
TTCGACATCTACATCAAAAAAATGATGGCAATACCGCGACCTGCGAAGATTTTAATTATGCAATGGAA  
CAGGCCTATAAAATGAAAAAAGCCGATAATAGCGCAATCTGAATCAGTATCTGCTGTGGTTTAGCCAG  
AGCGGTACACCGCATGTTAGCTTTAAATATAATTATGATGCCGAAAAAACAGTATAGCATTATGTG  
AATCAGTATACCAAACCGGATGAAAATCAGAAAGAAAAAACCCTGTTTATTCCGATTAGCGTGGG  
TCTGATTAATCCGGAATGGCAAAGAAATGATTAGCCAGACCACCTGGAAGTACCAAAGAAAGCG  
ATACCTTTGTGTTTAATAATATTGCCGTGAAACCGATTCCGAGCCTGTTTCGTGGTTTTAGCGACCGGT  
TTATATTGAAGATAATCTGACCGATGAAGAACGTATTCTGCTGCTGAAATATGATAGTGATGCCTTTGT  
GCGCTATAATAGCTGCACCAATATTTATATGAAGCAAATCCTGATGAACTATAATGAATTTCTGAAAGC  
CAAAAATGAAAACTGGAATCCTTTAATCTGACACCGGTTAATGCCAGTTTATTGATGCCATTAATAT  
CTGCTGGAAGATCCGCATGCAGATGCAGTTTTAAAGCTATATTGTTAGCCTGCCGCAGGATCGCTAT  
ATTATTAATTTTGTGAGCAATCTGGATACCGATGTTCTGGCAGATACCAAAGAATATATTTATAAACAAA  
TTGGCGATAAACTGAATGATGTGTATTATAAAATGTTTAAAAGCCTGGAAGCCAAAGCAGATGATCTG  
ACCTATTTAATGATGAAAGCCATGTGGATTTTATCAGATGAATATGCGTACCCTGCGTAATACCCTGC  
TGAGCCTGCTGTCAAAGCACAGTATCCGAATATTCTGAATGAAATTATTGAACATAGCAAAAGCCCGT  
ATCCGAGCAATTGGCTGACCAGCCTGAGCGTTAGCGCATACTTCGATAAATATTTGAACTGTACGATA  
AAACCTATAAACTGAGCAAAGATGATGAACTGCTGCTGCAAGAATGGCTGAAAACCGTTAGCCGTAGC

GATCGTAAAGATATTTATGAAATTCTGAAAAAACTGGAAAATGAAGTGCTGAAAGATAGCAAAAATCC  
GAATGATATTCGTGCAGTGTATCTGCCGTTTACCAATAATCTGCGTCGCTTTCATGATATTAGCGGCAAA  
GGCTATAAACTGATTGCCGAAGTTATTACCAAAACCGATAAAATTTAATCCGATGGTTGCAACCCAGCTG  
TGTGAACCGTTTAACTGTGGAATAAACTGGATACCAACGTCAAGAAGTATGCTGCTGAATGAAATGAA  
TACCATGCTGCAAGAACCGAATATTAGCAATAATCTGAAAGAATATCTGCTGCGCCTGACCAATAAACT  
GGCTGCAGAAAAAATGGCTACACGTGCAAGTGCAGCTATGAGTAAAGGAGAAGAACTTTTCACTGGA  
GTTGTCCCAATTCTTGTGAATTAGATGGTGTATGTTAATGGGCACAAATTTTCTGTCACTGGAGAGGGT  
GAAGGTGATGCAACATACGGAAAACTTACCCTTAAATTTATTTGCACTACTGGAAAACTACCTGTTCCAT  
GGCCAACACTTGTCACTACTTTCGCGTATGGTCTTCAATGCTTTCGAGATACCCAGATCATATGAAACA  
GCATGACTTTTTCAAGAGTGCCATGCCCGAAGGTTATGTACAGGAAAGAACTATATTTTTCAAAGATGA  
CGGGAACACAAAGACACGTGCTGAAGTCAAGTTTGAAGGTGATACCCTTGTTAATAGAATCGAGTTAA  
AAGGTATTGATTTTAAAGAAGATGGAAACATTCTTGGACACAAATTGGAATACAACATAACTCACACA  
ATGTATACATCATGGCAGACAAACAAAAGAATGGAATCAAAGTTAACTTCAAAATTAGACACAACATTG  
AAGATGGAAGCGTTCAACTAGCAGACCATTATCAACAAAATACTCCAATTGGCGATGGCCCTGTCCTTT  
TACCAGACAACCATTACCTGTCCACACAATCTGCCCTTTCGAAAGATCCCAACGAAAAGAGAGACCACA  
TGGTCTTCTTGAGTTTGTAAACAGCTGCTGGGATTACACATGGTATGGATGAACATAACAAAGCAACGC  
GTCCGTACGACGTCCCGGACTACGCTGGCTATCCCTATGATGTGCCCGATTATGCGTATCCGTACGATG  
TTCCAGATTATGCCGCTGCTAGTTTTTAAATATGCAGAATAAAATAAATAAGTAAATATCATACGTTTAT  
ATGTATATATATATATATATATATATTTGAGACGTATATTTATATATGCATTATATATACATTCGTATAA  
ATATACGTGCATGTAACTTTTCTATATTATTATTTTTTTTATTTATTATCATTTTTTTTTTTCTTA  
TGTATTTTTAATATATATATATATATATATTTATTTATTTATTTATTAGTAGATAATTTTTTTTATCTTGT  
TTTAACTGAAATAATTCTAAATTTCTTAAATGCAGGAACAAAATATAAACGGTTTATGGTTTTATTATT  
TATATTATATATATGAAAAATATAATTTTTGTTCATTTACACATAAATGTCACACAAAAGAGAAATAAC  
ATAAATGTTTATATTTTTTTAACCTGCCAATTTTAGAAGCATAAAATGTTATATTTTTACCAAAAAAAA  
AAAAAAAATAAATAAATAAATAAATGAAATATAATAAAAAATATAATTAAATATATAATAATAATAA  
AATAAATGTAAGGCACATTTTTAAAAGACAATATTTATAAGTCCATTTAACATTATTATTGAGCGTACA  
TTACTCCTCTTTTTATTAAGTGATCGATGCGGCCGCTTAATCATTCTTCTGAGTATTCTATAGTGCACC  
TAAATAGCTTGGCGTAATCATGGTCATAGCTGTTTCCTGTGTGAAATTGTTATCCGCTCACAATCCACA  
CAACATACGAGCCGGAAGCATAAAGTGTAAGCCTGGGGTGCCTAATGAGTGAGCTAACTCACATTAA  
TTGCGTTGCGCTCACTGCCGCTTCCAGTCGGGAAACCTGTCGTGCCAGCTGCATTAATGAATCGGCC  
AACGCGCGGGGAGAGGCGGTTTGCGTATTGGGCGCTCTCCGCTTCCTCGCTCACTGACTCGCTGCGCT  
CGGTGTTTCGGCTGCGGCGAGCGGTATCAGCTCACTCAAAGGCGGTAATACGGTTATCCACAGAATCA  
GGGGATAACGCAGGAAAGAACATGTGAGCAAAAGGCCAGCAAAAGGCCAGGAACCGTAAAAAGGCC  
GCGTTGCTGGCGTTTTTCGATAGGCTCCGCCCCCTGACGAGCATCACAAAAATCGACGCTCAAGTCAG  
AGGTGGCGAAACCCGACAGGACTATAAAGATACCAGGCGTTTCCCCCTGGAAGCTCCCTCGTGCGCTC  
TCCTGTTCCGACCCTGCCGCTTACCGGATACCTGTCCGCCTTCTCCCTTCGGGAAGCGTGGCGCTTTCT  
CATAGCTCACGCTGTAGGTATCTCAGTTCGGTGTAGGTGCTTCGCTCCAAGCTGGGCTGTGTGCACGAA  
CCCCCGTTTACGCCGACCGCTGCGCCTTATCCGGTAACTATCGTCTTGAGTCCAACCCGGTAAGACAC  
GACTTATCGCCACTGGCAGCAGCCACTGGTAACAGGATTAGCAGAGCGAGGTATGTAGGCGGTGCTAC  
AGAGTTCTTGAAGTGGTGGCCTAACTACGGCTACACTAGAAGGACAGTATTTGGTATCTGCGCTCTGCT  
GAAGCCAGTTACCTTCGGA AAAAGAGTTGGTAGCTCTTGATCCGGCAAACAAACCACCGCTGGTAGCG  
GTGGTTTTTTTGTGCAAGCAGCAGATTACGCGCAGAAAAAAGGATCTCAAGAAGATCCTTTGATCT  
TTTCTACGGGGTCTGACGCTCAGTGAACGAAAACTCACGTTAAGGGATTTTGGTCATGAGATTATCAA  
AAAGGATCTTACCTAGATCCTTTTAAATTA AAAATGAAGTTTTAAATCAATCTAAAGTATATATAGTA  
AACTTGGTCTGACAGTTACCAATGCTTAATCAGTGAGGCACCTATCTCAGCGATCTGTCTATTTCGTTCA

TCCATAGTTGCCTGACTCCCCGTCGTGTAGATAACTACGATACGGGAGGGCTTACCATCTGGCCCCAGT  
GCTGCAATGATACCGCGAGACCCACGCTCACCGGCTCCAGATTTATCAGCAATAAACAGCCAGCCGG  
AAGGGCCGAGCGCAGAAGTGGTCCTGCAACTTTATCCGCCTCCATCCAGTCTATTAATTGTTGCCGGGA  
AGCTAGAGTAAGTAGTTCGCCAGTTAATAGTTTTCGCAACGTTGTTGGCATTGCTACAGGCATCGTGGT  
GTCACGCTCGTCGTTTGGTATGGCTTCATTACGCTCCGGTCCCAACGATCAAGGCGAGTTACATGATC  
CCCCATGTTGTGCAAAAAAGCGGTTAGCTCCTTCGGTCTCCGATCGTTGTCAGAAAGTAAGTTGGCCGC  
AGTGTATCACTCATGGTTATGGCAGCACTGCATAATTCTTACTGTCATGCCATCCGTAAGATGCTTT  
TCTGTGACTGGTGAGTACTCAACCAAGTCATTCTGAGAATAGTGTATGCGGCGACCGAGTTGCTCTTGC  
CCGGCGTCAATACGGGATAATACCGCGCCACATAGCAGAACTTTAAAAGTGCTCATCATTGGAAAACG  
TTCTTCGGGGCGAAAACCTCAAGGATCTTACCCTGTTGAGATCCAGTTCGATGTAACCCACTCGTGC  
ACCCAACCTGATCTTCAGCATCTTTTACTTTACCAGCGTTTCTGGGTGAGCAAAAACAGGAAGGCAAAA  
TGCCGCAAAAAGGGAATAAGGGCGACACGGAAATGTTGAATACTCATACTCTTCTTTTCAATATTA  
TTGAAGCATTTATCAGGGTTATTGTCTCATGAGCGGATACATATTTGAATGTATTTAGAAAAATAACA  
AATAGGGGTTCCGCGCACATTTCCCGAAAAAGTGCCACCTGACGTCTAAGAAACCATTATTATCATGAC  
ATTAACCTATAAAAAATAGGCGTATCACGAGGCCCTTTCGTCTCGCGCGTTTCGGTGATGACGGTGAAAA  
CCTCTGACACATGCAGCTCCCGGAGACGGTCACAGCTTGTCTGTAAGCGGATGCCGGGAGCAGACAAG  
CCCGTCAGGGCGCGTCAGCGGGTGTGGCGGGTGTCGGGGCTGGCTTAAGTATGCGGCATCAGAGCA  
GATTGTACTGAGAGTGCACCATATGCGGTGTGAAATACCGCACAGATGCGTAAGGAGAAAAATACCGCA  
TCAGGCGCCATTCGCCATTACAGGCTGCGCAACTGTTGGGAAGGGCGATCGGTGCGGGCCTCTTCGCTA  
TTACGCCAGCTGGCGAAAGGGGGATGTGCTGCAAGGCGATTAAGTTGGGTAACGCCAGGGTTTTCCCA  
GTCACGACGTTGTAAAACGACGGCCAGTGAATTGTAATACGACTCACTATAGAATTCAGATTTAATAA  
ATATGTTCTTATATATAATGAGAAAATAAATATTTAACATATGTTAAAAAGAAAAATTTAAGATTTACAT  
GATTAGGAATAAAAAATATTAAGCTATATATTAATGTTGTACTTTATGTTTATTTGTAAGATAAAT  
ATAATTTTATTAATAATTTATATTTATTATTATAAGTTCTTAGAAAAATACATTTTGTTTTAAAAATAA  
CTATAAAAAAGAACATAATAAAAAATAAAATACAATTAAAAACATAATTAAAAAGAAAAATACAGACAG  
TAAAAAAAATCGCTATCCATAAAATTACAAAACATGAATTAATAAACATATATTGTTTATTAATAAAATT  
GTAAGTTATTTTATATATACATAATAAATTAAAGATACTGAAACAATAATTTTAAATGTAATAAATGA  
ATAATGATATGTTTTATATGATTCATTATTCTATATTATAAGGAAGATTACAAAAAAAATTCATATGT  
ATTTTTTTGTAATTTCTGTGTTTATGTTTTATTTTTATAATTTTTAATCTATTATTAATTAAGCTTAAT  
CATTCTTCTCATATACTTCAAATTTGTACTTAATGCCTTCTCCTCCTGGACATCAGAGAGAACACCTGGG  
TATTCTGGCAGAAGTTTATATTTCTCAAATCAATTTCTGGAAAAAACGTGTCACCTTCAAAGTCTTGCA  
GATCCTTGTCACAAATAGTTAAGATGGCCTGGGTGATTCATGGCTTCTTATAAACAGAACTGCCACC  
AACTATCCAGACCATGTCTACTTTATTGCTAATTCTGGTGTTCAGTAAGTTTAAAGGCATCATCTAGAC  
TTCTGGAAAGAAAATGAGCTCCTTGTGGAGGTTCTTGAGTTCTCTGCTGAGAACTAAATTAATTCTACC  
CTTAAAGGTCGATTCTTCTCAGGAATGGAGAACCAGGTCTTCTTACCATAATCACCAGATTCTGTTTA  
CCTTCTACTGAAGAGGTTGTGGTCATTCTCTGGAATATCTAAATTCGTTCTGAGCGGTGGCCAGGGG  
TAGTCCCCGTTCTTGCCGATGCCCATGTTCTGGGACACAGCGACGATGCAGTTTAGCGAACCATGCATG  
GATCCTTTTATAAAATTTTTATTTATTATAAGCAAATATATATTTTATATATTTATTTTATATTTGAAAT  
ATTTTTAAATTTAATTTAATTTTTATTATATACTTTAAAAATGGCAGTTATTAAAAAATAAGGATAAAA  
TTATTATTATTTAATTTGGTGTGTTTGTATTTTTTTGTTATATAATATTAATTTAATTTGGAGAAAAT  
GTTTATTGTATTCAATATAATAACATAATATTTATTTTATTTTATTTTATTTTATTTTATTTTCA  
ACTCTATACTATGTACTTATGTGTATAAATTATTAATAAATAAAAAATATTATAAAATGCATATAATGTA  
GGGATAAAATATTACTATATTTATAGTGTGAGTGCAGGTGTAAAAATCCTCGGAGTATAAAAAATAAAA  
TGGATTATTTAAAAAAGGTAAGTGCATAAAACATTTAATTTGATGCTTGTAGATGAGTTAAG

**Plasmid features:**

EF1-alpha elongation factor 1 alpha of *Plasmodium falciparum*

XhoI enzyme cleavage site

PfA-M1 + GFP (*Plasmodium falciparum* aminopeptidase coding sequence without signal peptide and stop codon, in frame with GFP)

Guanine added to keep PfA-M1 in frame with GFP and hemagglutinin

PstI enzyme cleavage site

3x hemagglutinin coding sequence

CAM 3'UTR (3'untranslated region from *Plasmodium falciparum* calmodulin gene)

Beta lactamase coding sequence (ampicillin resistance)

HRP 3' UTR (3'untranslated region from the histidine rich protein of *Plasmodium falciparum*)

hDHFR (human dihydrofolate reductase coding sequence, resistance to WR99210)

EF-1 beta (elongation factor 1 beta promoter from *Plasmodium falciparum*)
